# Supplementary material
Source: publisher figshare collection journal article supplement (https://acs.figshare.com/ndownloader/files/4562443)
Supplement: Supplementary file 1 [file 4562443]

# SUPPORTING INFORMATION

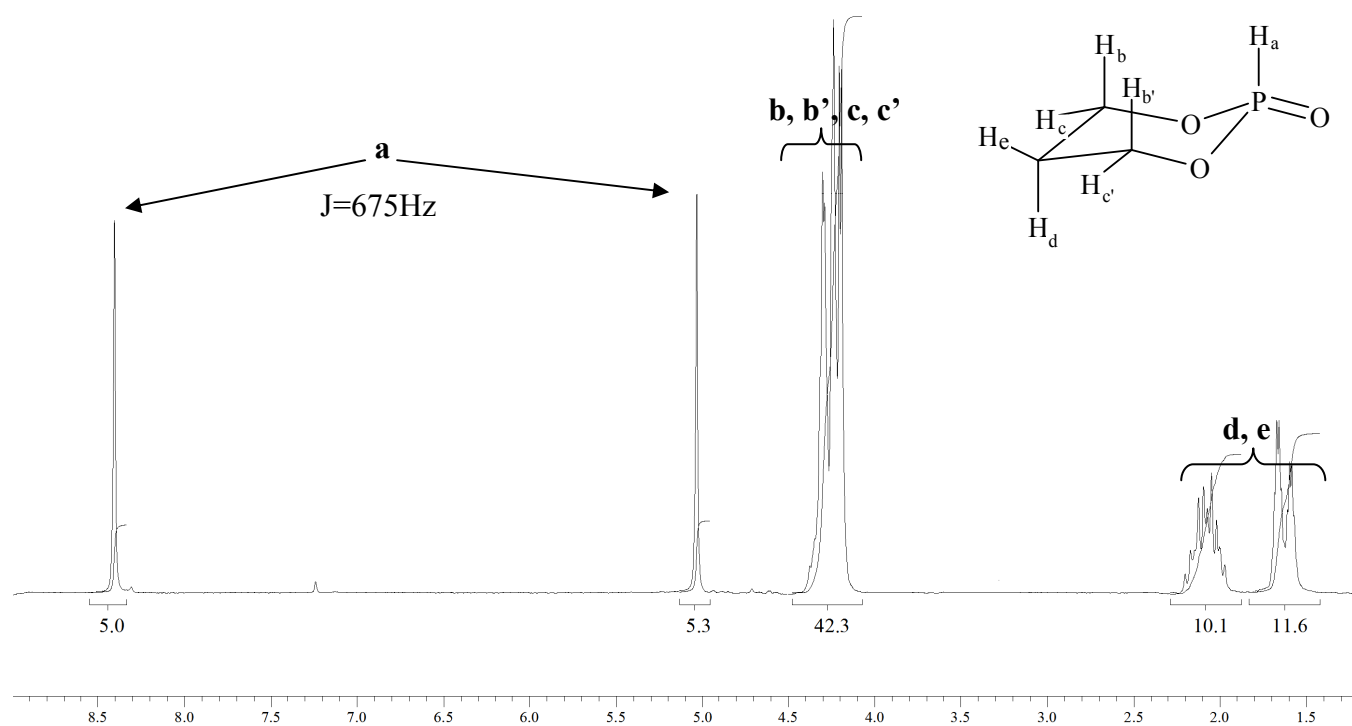

Figure 1':  $^1\text{H}$  NMR spectrum of (1)

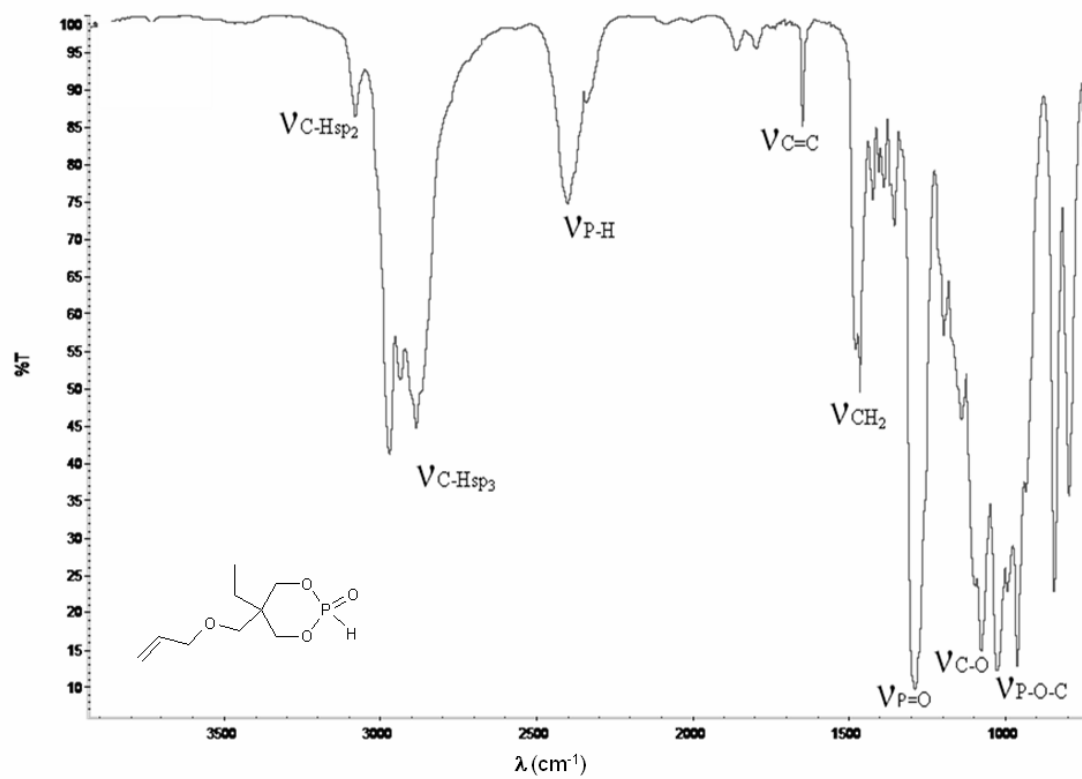

Figure 2': IR spectrum of monomer (2)

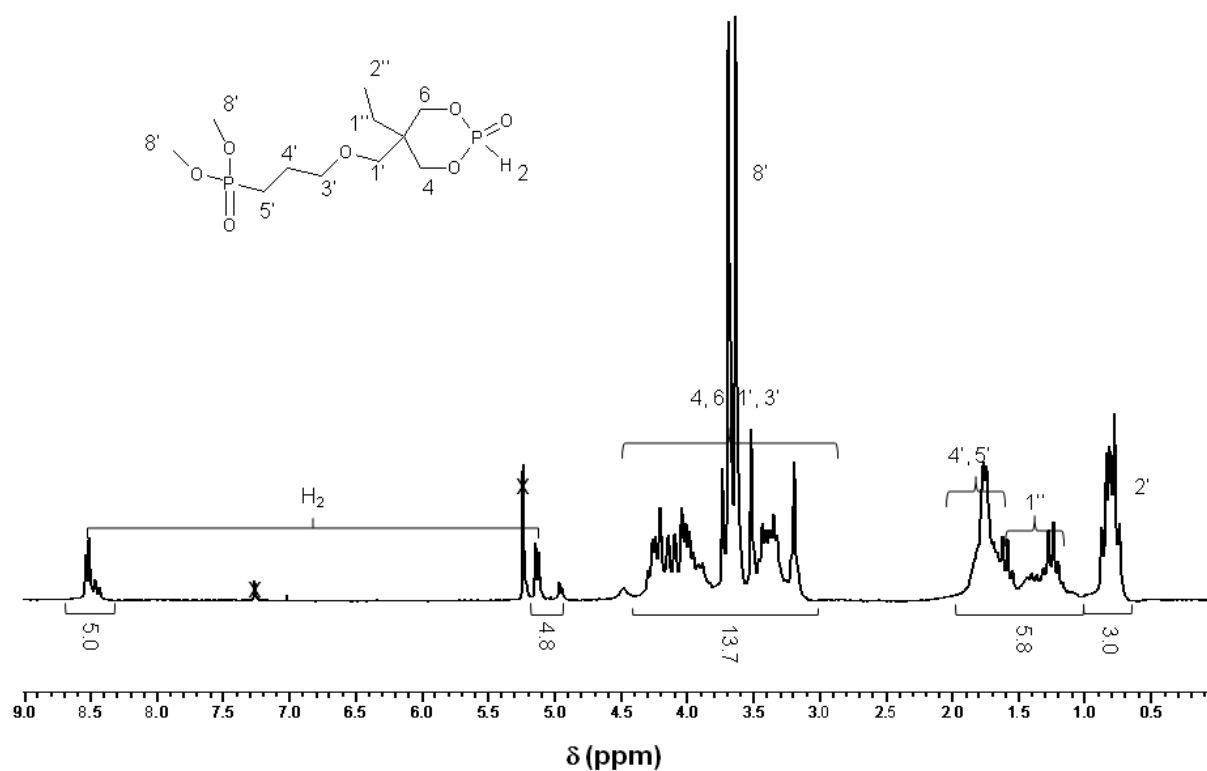

Figure 3':  $^1\text{H}$  NMR of product (3', 1) in  $\text{CDCl}_3$  (synthesis with monomer (2))

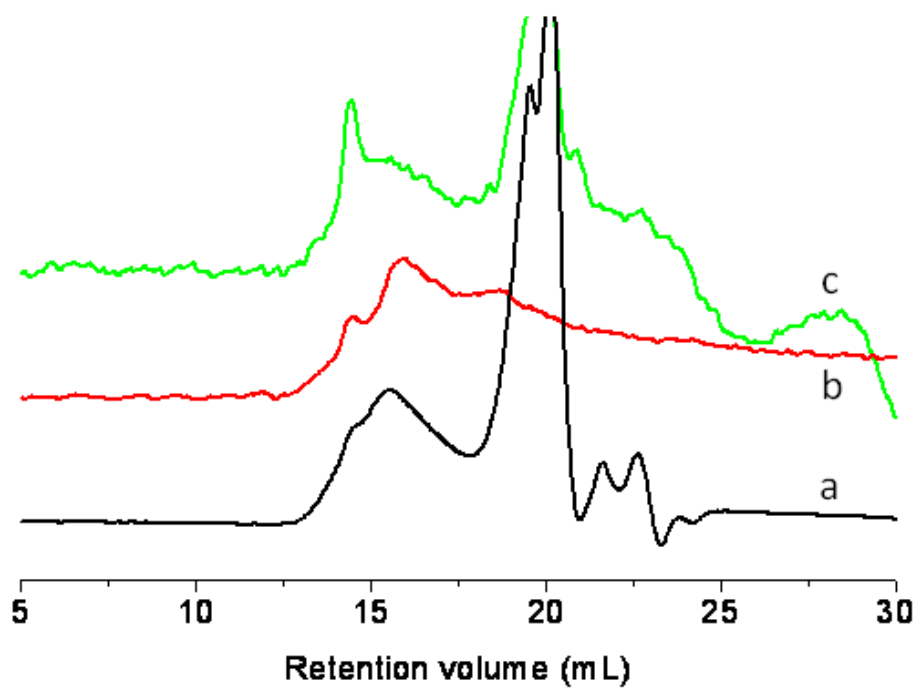

Figure 4': SEC chromatograms including triple detectors traces (Refractometer (a), Light Scattering (b) and Viscosity (c) detectors) of the total product mixture after homopolymerization.

Triple detection SEC had been carried out on a TDA300-EXD apparatus from Viscotek with three detectors connected in series, i.e., light scattering, refractometer and viscosimeter detectors. The temperature of analysis, 70°C, was set both in columns and in the detector room to ensure a better reproducibility, as well as a stable baseline throughout the characterization. Two linear ultrahydrogel GMHHR-H columns and a HHR-H Guard precolumn (both from Viscotek) were used. Dimethylformamide was chosen as an eluent, at a flowrate of 0.8 mL. min<sup>-1</sup>, without the need for a flow marker.

This information is available free of charge via the Internet at <http://pubs.acs.org>
